# Supplementary material for: Characterization and Molecular Dynamics Simulation of a Lipase Capable of Improving the Functional Characteristics of an Egg-Yolk-Contaminated Liquid Egg White
Source: MDPI journal article supplement (doi:10.3390/foods12224098), 2023-11-11
Supplement: s1 [file s1]

## Supplementary Material

# Characterization and Molecular Dynamics Simulation of a Lipase Capable of Improving the Functional Characteristics of an Egg-Yolk-Contaminated Liquid Egg White

Linlin Xu <sup>1</sup>, Fei Pan <sup>2</sup>, Yingnan Li <sup>3</sup>, Huiqian Liu <sup>1</sup> and Chengtao Wang <sup>1,\*</sup>

- <sup>1</sup> Beijing Advanced Innovation Center for Food Nutrition and Human Health, Beijing Engineering and Technology Research Center of Food Additives, Beijing Technology & Business University (BTBU), Beijing 100048, China; xll18515351711@163.com (L.X.); q2223599235@163.com (H.L.)
- <sup>2</sup> State Key Laboratory of Resource Insects, Institute of Apicultural Research, Chinese Academy of Agricultural Sciences, Beijing 100093, China; yunitcon@yeah.net
- <sup>3</sup> Ministry of Education Key Laboratory of Industrial Biotechnology, School of Biotechnology, Jiangnan University, Wuxi 214122, China; yingnan3400189@gmail.com

\* Correspondence: wangchengtao@th.btbu.edu.cn; Tel.: +86-10-68984003

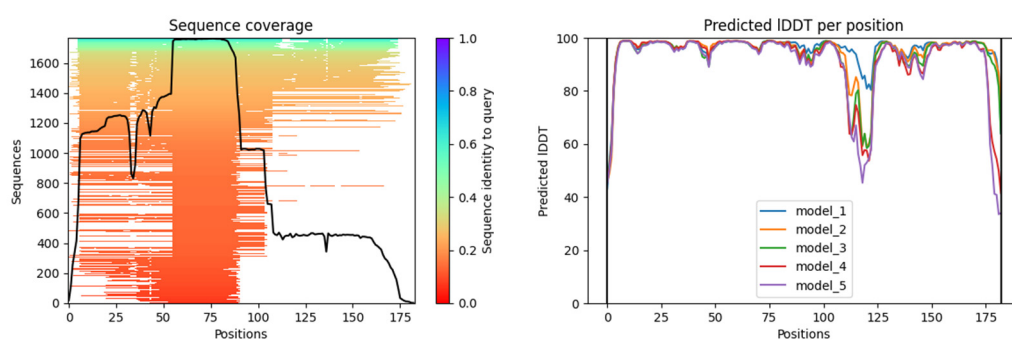

**Figure S1.** Evaluation of AlphaFold2 for predicting Lip-IM structure.
